# Supplementary material
Source: Research Square preprint supplement (doi:10.21203/rs.3.rs-8554813/v1)
Supplement: Supplementary file 1 [file ecf23c03ae4b330973df6d25.docx]

**Supplementary Figure 1.** Performance comparison of feature selection algorithms. Violin plots show the distribution of the Area Under the Receiver Operating Characteristic (AUROC) curve for three feature selection methods: Minimum Redundancy Maximum Relevance (mRMR), Lasso logistic regression, and Elastic-Net logistic regression. Performance was evaluated within a 20-repetition bootstrapping framework on the training data. Panel **(A)** displays the results using the clinical dataset, and panel **(B)** shows the results using the spirometric dataset.


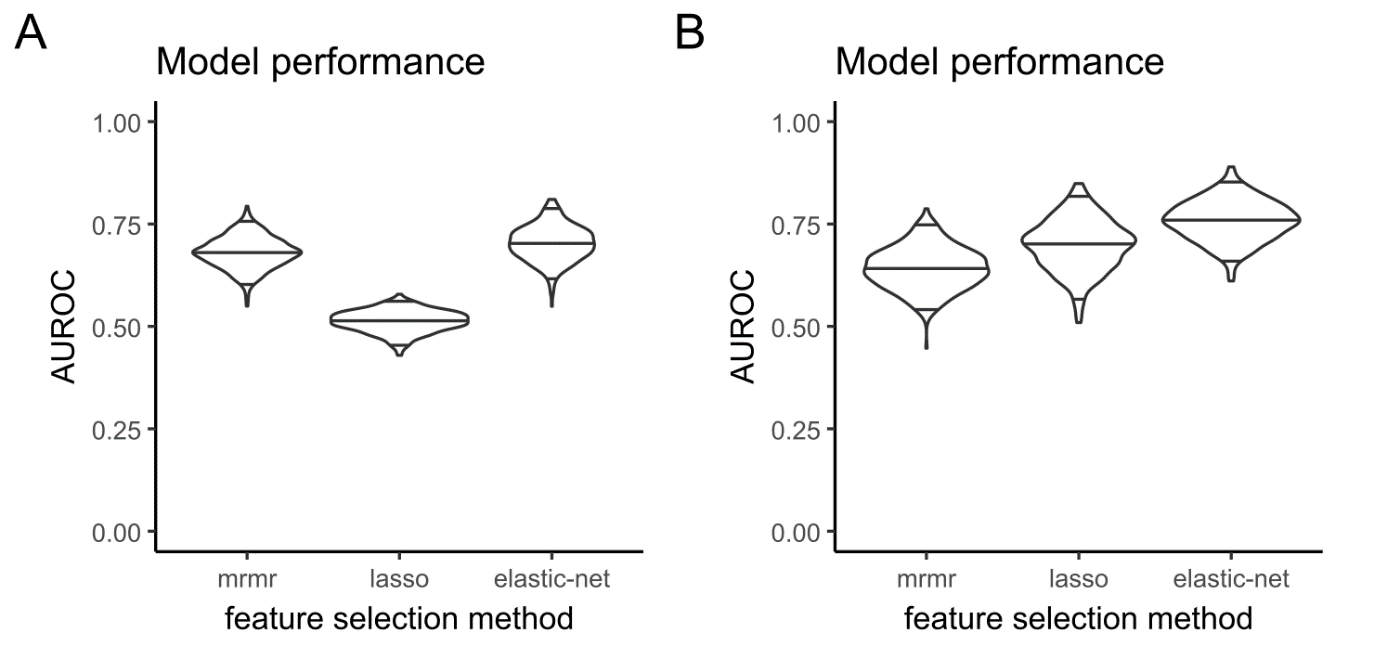


**Supplementary Figure 2. Elastic-net feature importance ranking for clinical variables. The higher the number, the greater the relevance of the predictor for the algorithm.**


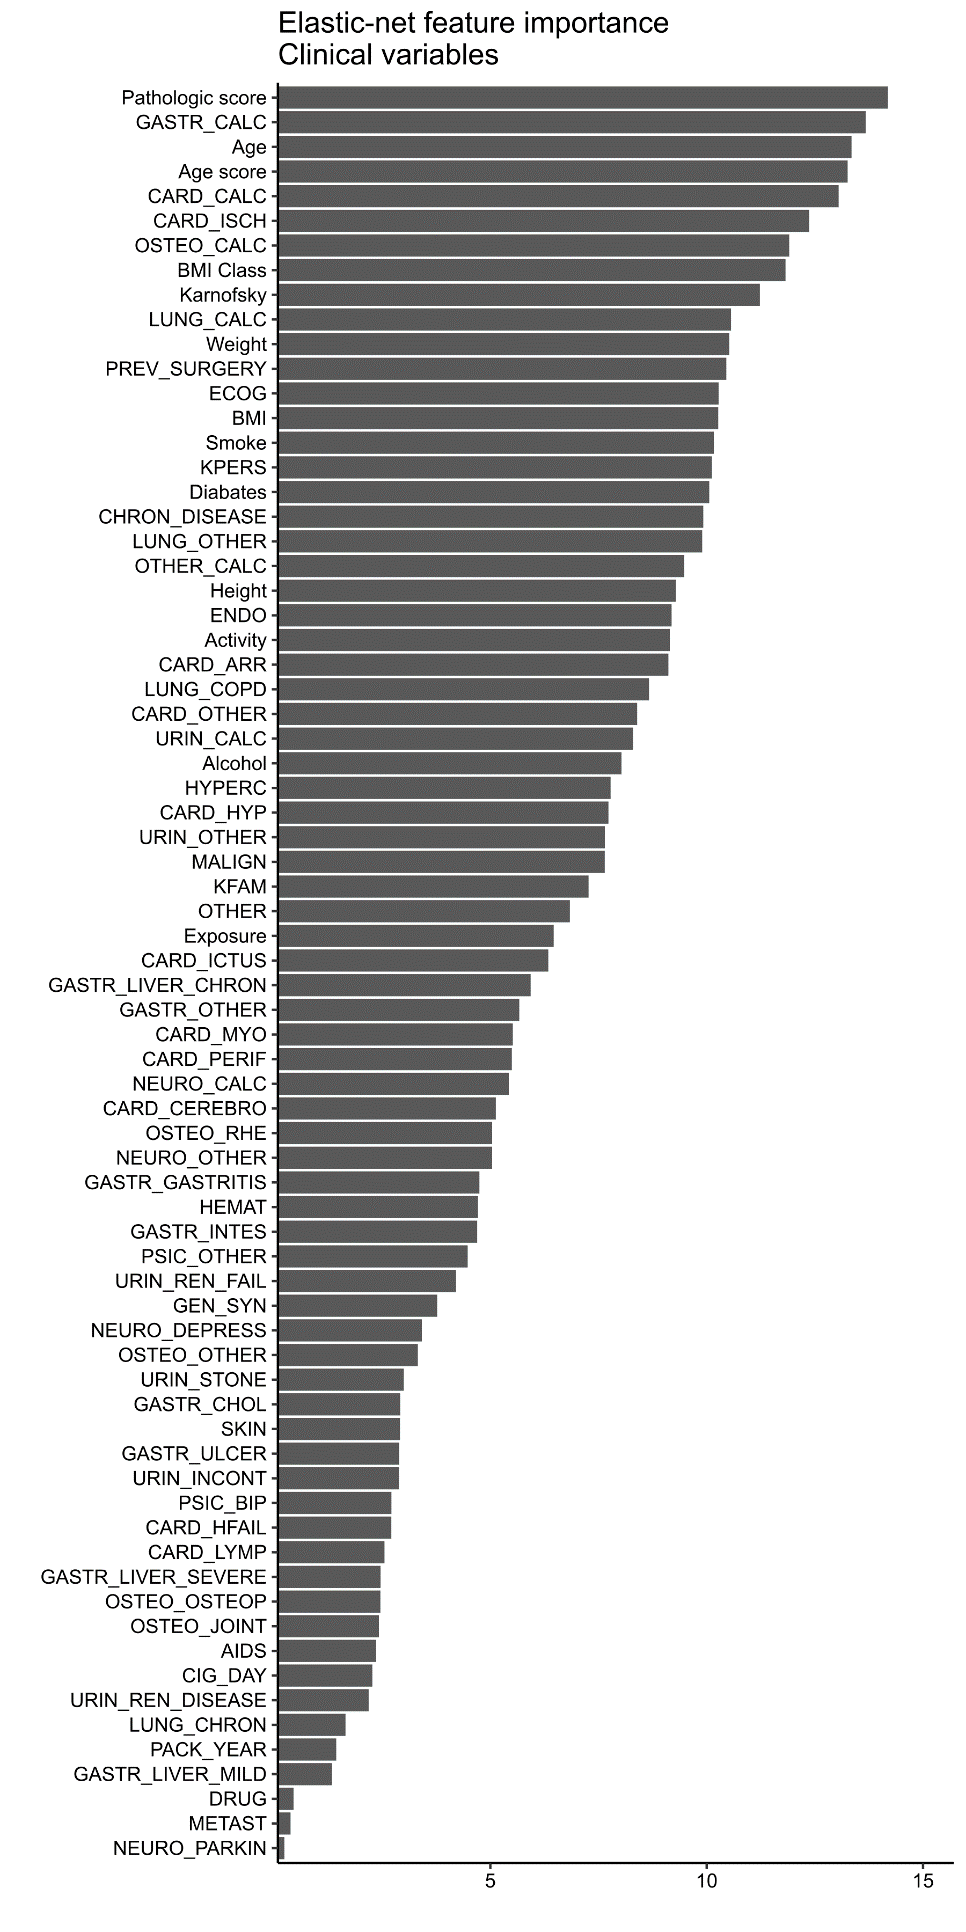


**Supplementary Figure 3. Elastic-net feature importance ranking for spirometric variables. The higher the number, the greater the relevance of the predictor for the algorithm.**


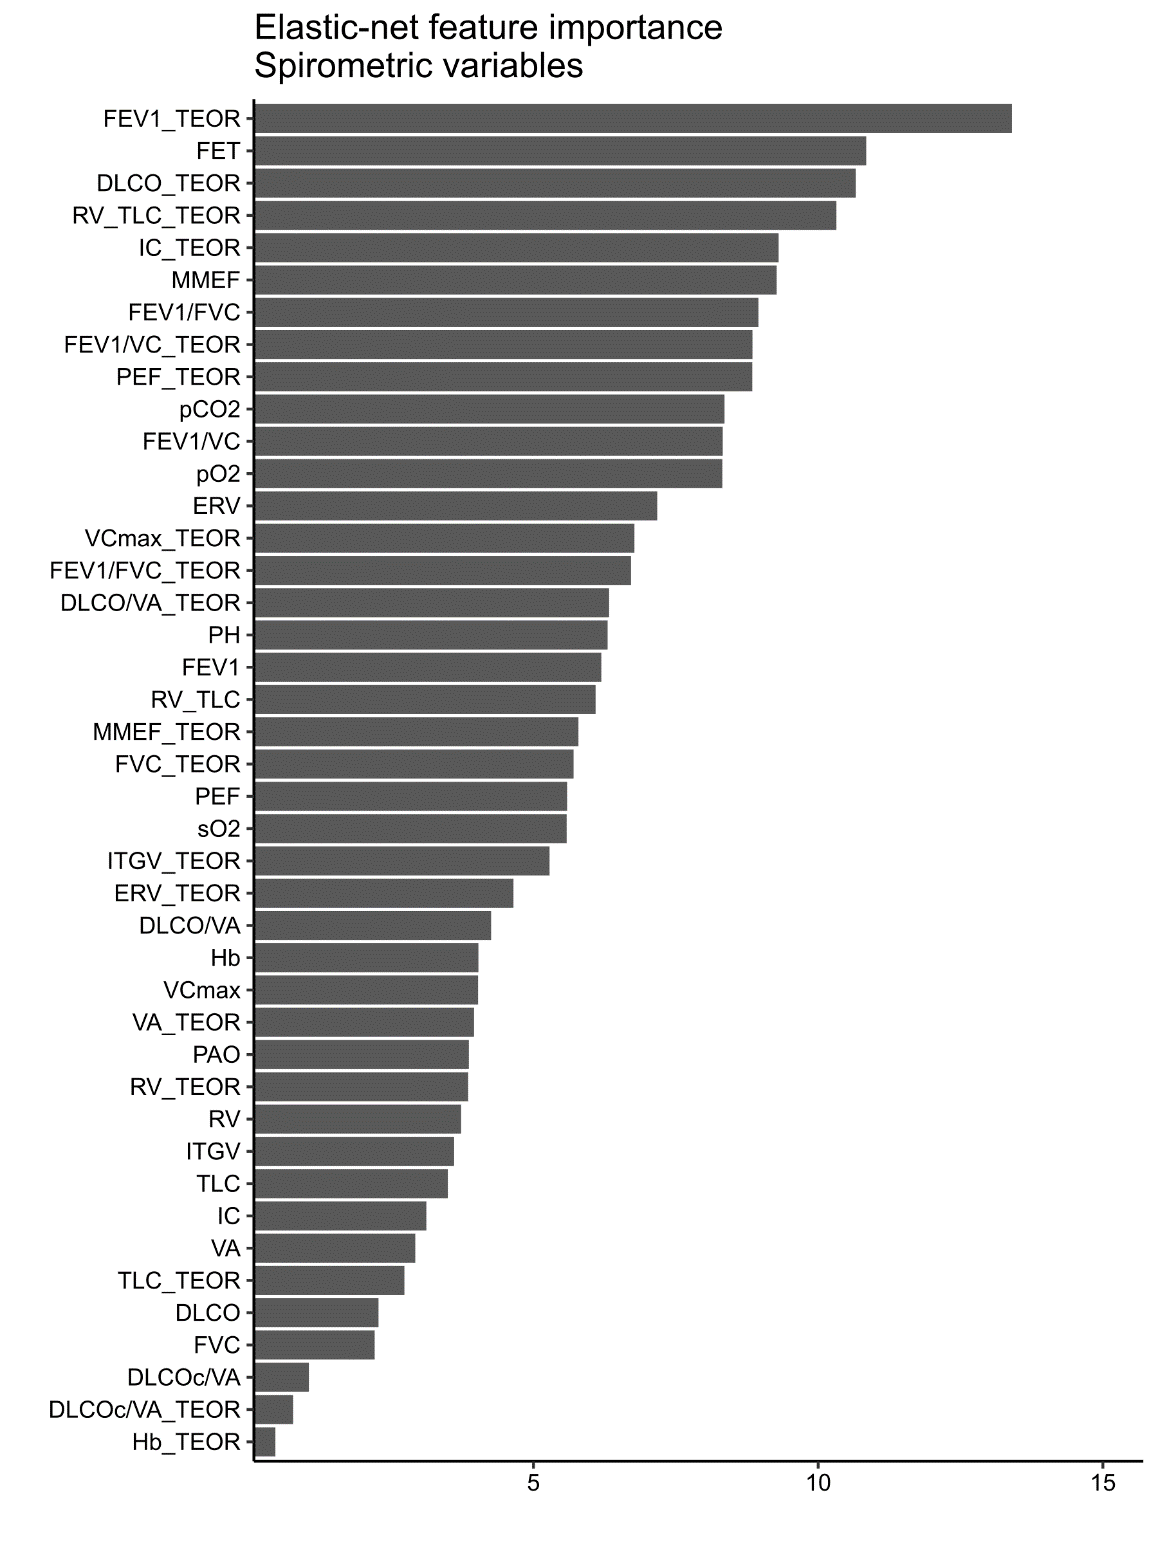


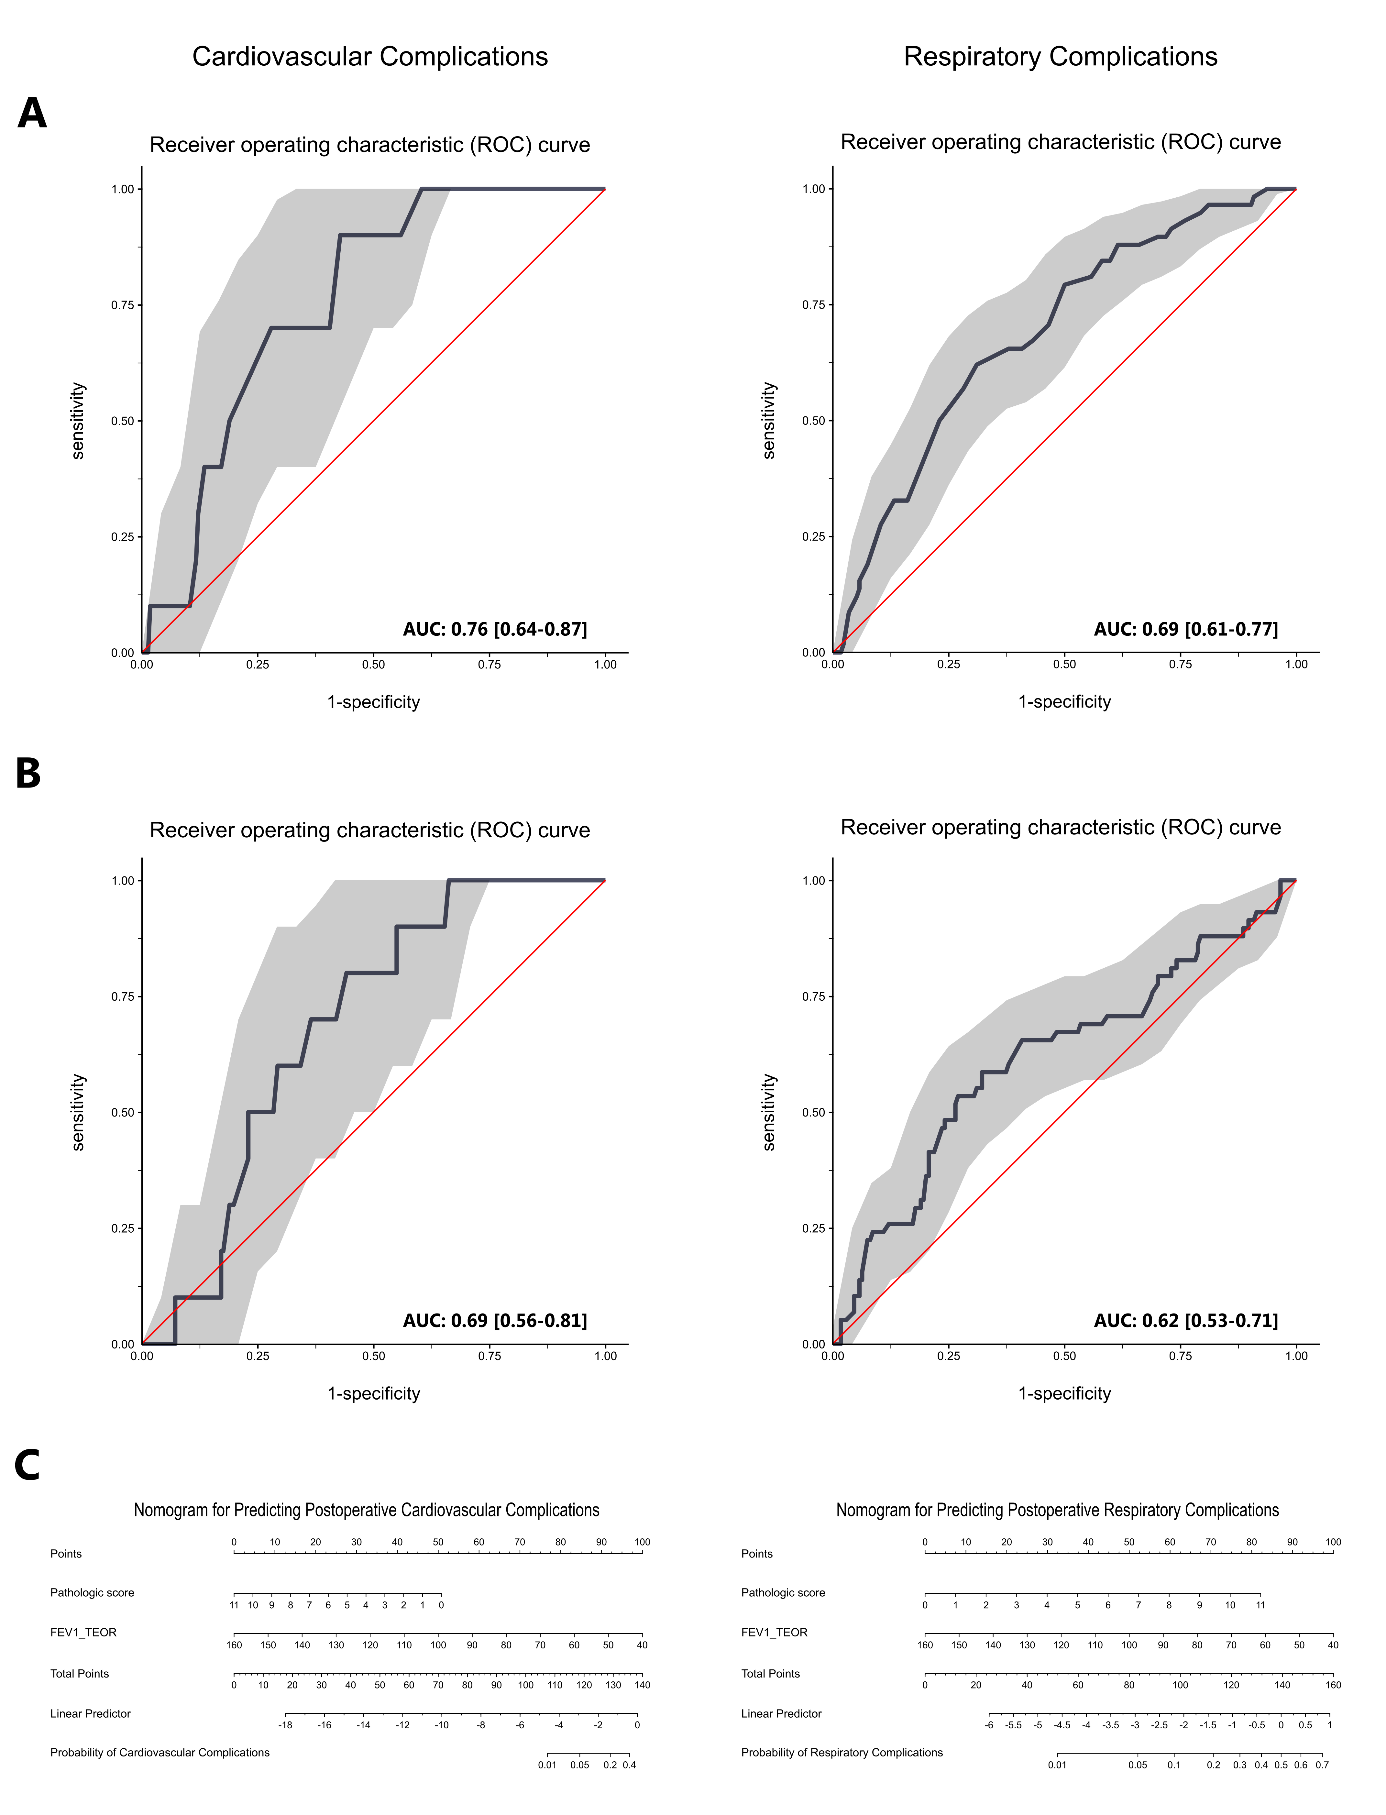
**Supplementary Figure 4. Model performance in the external validation cohort, evaluated by Area Under the Receiver-Operator Characteristic (AUROC) curves. The panels show the performance of deployment models for two distinct outcomes: (A) cardiovascular complications and (B) respiratory complications. Within each panel, the curve on the left represents a model using FEV1_TEOR​ alone, while the curve on the right represents the combined model using both the Pathologic Score and FEV1_TEOR​. For all curves, the light grey shading represents the bootstrapped 95% confidence interval, and the red line indicates the performance of a random classifier (AUC = 0.50).**
