# Supplementary material
Source: Research Square preprint supplement (doi:10.21203/rs.3.rs-8554813/v1)
Supplement: Supplementary file 2 [file ed9c08ea0f8f405ee6aab384.docx]

**Supplementary Table 1A. Description of preoperative clinical variables and their completeness rates.**

| Variable | Definition | Variable type | % |
| --- | --- | --- | --- |
| Sex | Sex | categorical | 99.6 |
| Ethnic | Ethnic background | categorical | 99.6 |
| Race | Race | categorical | 100 |
| Age | Age | numeric | 100 |
| Age score | Score based on patient’s age | categorical | 100 |
| BMI | Body Mass Index | numeric | 100 |
| BMI Class | BMI classification | categorical | 100 |
| Pathologic score | Charlson Age-Comorbidity Index | categorical | 100 |
| Activity | Physical activity | categorical | 98.7 |
| ECOG | Eastern Cooperative Oncology Group (ECOG) Performance Status Score | categorical | 99.6 |
| Karnofsky | Karnofsky performance status score | categorical | 99.6 |
| Height | Height [cm] | numeric | 100 |
| Smoke | Smoker | categorical | 100 |
| Smoke Age | Age at the start of smoking | numeric | 74.5 |
| CIG_DAY | Number of cigarettes per day | categorical | 77.9 |
| PACK_YEAR | Number of cigarettes packs/year | numeric | 75.8 |
| Weight | Weight [Kg] | numeric | 100 |
| KFAM | Familiar history of cancer | binary | 100 |
| KPERS | Personal history of cancer | binary | 100 |
| AIDS | Acquired Immunodeficiency Syndrome (AIDS) | binary | 100 |
| Alcohol | Consuming alcohol | binary | 100 |
| GEN_SYN | Genetic Syndromes | binary | 96.1 |
| MALIGN | Any malignancy | categorical | 100 |
| METAST | Metastatic solid tumor | categorical | 100 |
| PREV_SURGERY | Previous surgery | binary | 96.1 |
| SKIN | Skin diseases | categorical | 100 |
| CHRON_DISEASE | Chronic diseases | binary | 96.5 |
| Diabates | Diabetes | categorical | 100 |
| DRUG | Drug use | binary | 100 |
| ENDO | Endocrinopathies or metabolic disorder | categorical | 100 |
| Exposure | Environmental agents' exposure | binary | 100 |
| CARD_ARR | Cardiac arrhythmia | categorical | 100 |
| CARD_CALC | Cardiovascular pathologies count | numeric | 100 |
| CARD_CEREBRO | Cerebrovascular disease | categorical | 100 |
| CARD_HFAIL | Heart failure | binary | 100 |
| CARD_HYP | Hypertension | categorical | 100 |
| CARD_ICTUS | Previous ictus | binary | 100 |
| CARD_ISCH | Ischemic heart disease | categorical | 100 |
| CARD_LYMP | Lymphoma | categorical | 100 |
| CARD_MYO | Previous myocardial infarction | binary | 100 |
| CARD_OTHER | Other cardiovascular pathologies | categorical | 100 |
| CARD_PERIF | Peripheral vascular disease | categorical | 100 |
| GASTR_CALC | Gastro-intestinal pathologies count | numeric | 100 |
| GASTR_CHOL | Cholelithiasis | categorical | 100 |
| GASTR_GASTRITIS | Gastritis | categorical | 100 |
| GASTR_INTES | Intestinal disease | categorical | 100 |
| GASTR_LIVER_CHRON | Chronic liver disease | categorical | 100 |
| GASTR_LIVER_MILD | Mild liver disease | categorical | 100 |
| GASTR_LIVER_SEVERE | Severe liver disease | categorical | 100 |
| GASTR_OTHER | Other gastro-intestinal pathologies | categorical | 100 |
| GASTR_ULCER | Gastric or duodenal ulcer | categorical | 100 |
| HEMAT | Hematologic diseases | binary | 100 |
| HEMIPL | Hemiplegia | categorical | 100 |
| HYPERC | Hypercholesterolemia | categorical | 100 |
| LUNG_COPD | Chronic obstructive pulmonary disease | categorical | 100 |
| LUNG_CALC | Lung pathologies count | numeric | 100 |
| LUNG_CHRON | Interstitial Chronic lung disease | categorical | 100 |
| LUNG_OTHER | Other lung pathologies | categorical | 100 |
| NEURO_CALC | Neurological pathologies count | numeric | 100 |
| NEURO_DEMENTIA | Dementia | categorical | 100 |
| NEURO_DEPRESS | Depression | categorical | 100 |
| NEURO_OTHER | Other neurological pathologies | categorical | 100 |
| NEURO_PARKIN | Parkinsonism | binary | 100 |
| OSTEO_CALC | Osteoarticular pathologies count | numeric | 100 |
| OSTEO_JOINT | Degenerative joint disease | categorical | 100 |
| OSTEO_LEU | Leukemia | categorical | 100 |
| OSTEO_OSTEOP | Osteoporosis | categorical | 100 |
| OSTEO_OTHER | Other osteoarticular pathologies | categorical | 100 |
| OSTEO_RHE | Rheumatic Disease | categorical | 100 |
| OTHER | Other pathology | categorical | 100 |
| OTHER_CALC | Other pathologies count | numeric | 100 |
| PSIC_BIP | Bipolar Disorders | categorical | 100 |
| PSIC_OTHER | Other psychiatric disorders | categorical | 100 |
| PSIC_SCHIZ | Schizophrenia and Related Disorders | categorical | 100 |
| URIN_CALC | Genito-urinary pathologies count | numeric | 100 |
| URIN_INCONT | Urinary incontinence | categorical | 100 |
| URIN_OTHER | Other genito-urinary pathologies | categorical | 100 |
| URIN_REN_DISEASE | Renal Disease | categorical | 100 |
| URIN_REN_FAIL | Chronic renal failure | categorical | 100 |
| URIN_STONE | Kidney stone | categorical | 100 |

**Supplementary Table 1B. Description of preoperative spirometric variables and their completeness rates.**

| Variable | Definition | Variable type | % |
| --- | --- | --- | --- |
| PH | PH | numeric | 95.5 |
| pCO2 | Partial pressure of carbon dioxide [mmHg] | numeric | 95.5 |
| pO2 | Partial pressure of oxygen [mmHg] | numeric | 95.5 |
| sO2 | Oxygen saturation [%] | numeric | 94.9 |
| FET | Forced expiratory time [sec] | numeric | 88.1 |
| VA | Alveolar volume [L] | numeric | 89.2 |
| VA_TEOR | The ratio of VA to its theoretical value [%] | numeric | 80.7 |
| DLCO | Diffusing capacity of carbon monoxide unadjusted [ml/(min * mmHg)] | numeric | 87.5 |
| DLCO_TEOR | The ratio of DLCO to its theoretical value [%] | numeric | 86.4 |
| DLCOPB | Diffusing capacity of carbon monoxide PB adjusted [ml/(min * mmHg)] | numeric | 56.8 |
| DLCO/VA | Diffusing capacity of carbon monoxide on total alveolar volume [ml/(min * mmHg * L)] | numeric | 84.7 |
| DLCO/VA_TEOR | The ratio of DLCO/VA to its theoretical value [%] | numeric | 83 |
| DLCOc/VA | Corrected diffusing capacity of carbon monoxide on total alveolar volume (ml/(min * mmHg * L)] | numeric | 62.5 |
| DLCOc/VA_TEOR | The ratio of DLCOc/VA to its theoretical value [%] | numeric | 60.2 |
| PAO | Pressure at the airway opening [mmHg] PRE | numeric | 66.5 |
| ITGV | Intra-thoracic gas volume [L] | numeric | 78.4 |
| ITGV_TEOR | The ratio of ITGV to its theoretical value [%] | numeric | 78.4 |
| PEF | Peak expiratory flow [L/s] | numeric | 90.3 |
| PEF_TEOR | The ratio of PEF to its theoretical value [%] | numeric | 86.4 |
| RV | Residual volume [L] | numeric | 90.3 |
| RV_TEOR | The ratio of RV to its theoretical value [%] | numeric | 90.3 |
| TLC | Total lung capacity (SB) [L] | numeric | 89.8 |
| TLC_TEOR | The ratio of TLC to its theoretical value [%] | numeric | 90.3 |
| RV_TLC | The ratio of residual volume to total lung capacity [%] | numeric | 88.6 |
| RV_TLC_TEOR | The ratio of RV_TLC to its theoretical value [%] | numeric | 88.6 |
| MMEF | Maximal mid-expiratory flow 75-25 [L/s] | numeric | 88.6 |
| MMEF_TEOR | The ratio of MMEF to its theoretical value [%] | numeric | 87.5 |
| VCmax | Maximal vital capacity [L] | numeric | 83 |
| VCmax_TEOR | The ratio of VCmax to its theoretical value [%] | numeric | 80.1 |
| IC | Inspiratory capacity [L] | numeric | 80.1 |
| IC_TEOR | The ratio of IC_SB to its theoretical value [%] | numeric | 73.9 |
| FEV1 | Forced expiratory volume in 1 second [L] | numeric | 94.9 |
| FEV1_TEOR | The ratio of FEV1 to its theoretical value [%] | numeric | 94.9 |
| FEV1/FVC | Ratio of FEV1 to the FVC [%] | numeric | 93.2 |
| FEV1/FVC_TEOR | The ratio of FEV1/FVC to its theoretical value [%] | numeric | 86.4 |
| FEV1/VC | Ratio of FEV1 to the VC [%] | numeric | 84.1 |
| FEV1/VC_TEOR | The ratio of FEV1/VC to its theoretical value [%] | numeric | 83.5 |
| FVC | Forced expiratory vital capacity [L] | numeric | 93.8 |
| FVC_TEOR | The ratio of FVC to its theoretical value [%] | numeric | 93.8 |
| Hb | hemoglobin [g(Hb)/dL] | numeric | 73.3 |
| Hb_TEOR | The ratio of Hb to its theoretical value [%] | numeric | 59.1 |
| ERV | expiratory reserve volume [L] | numeric | 90.3 |
| ERV_TEOR | The ratio of ERV to its theoretical value [%] | numeric | 80.1 |
